# Supplementary material for: A randomised controlled trial of a consumer-focused e-health strategy for cardiovascular risk management in primary care: the Consumer Navigation of Electronic Cardiovascular Tools (CONNECT) study protocol
Source: PubMed Central journal article supplement — BMJ Open. 2014 Jan 31;4(2):e004523. doi: 10.1136/bmjopen-2013-004523 (PMC3918991; doi:10.1136/bmjopen-2013-004523), 2014-01-31
Supplement: bmjopen-2013-004523.draft_revisions.pdf [file bmjopen-2013-004523.draft_revisions.pdf]

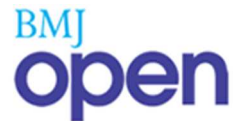

**A randomised controlled trial of a consumer focussed e-health strategy for cardiovascular risk management in primary care: the consumer navigation of electronic cardiovascular tools (CONNECT) study protocol**

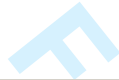

|                                 |                                                                                                                                                                                                                                                                                                                                                                                                                                                                                                                                                                                                                                                                                                                                                                                                                                                                                                                                                                                                                                                                                                                                                                                                                                                                                                                                                                                                                                                                                                                                                                        |
|---------------------------------|------------------------------------------------------------------------------------------------------------------------------------------------------------------------------------------------------------------------------------------------------------------------------------------------------------------------------------------------------------------------------------------------------------------------------------------------------------------------------------------------------------------------------------------------------------------------------------------------------------------------------------------------------------------------------------------------------------------------------------------------------------------------------------------------------------------------------------------------------------------------------------------------------------------------------------------------------------------------------------------------------------------------------------------------------------------------------------------------------------------------------------------------------------------------------------------------------------------------------------------------------------------------------------------------------------------------------------------------------------------------------------------------------------------------------------------------------------------------------------------------------------------------------------------------------------------------|
| Journal:                        | <i>BMJ Open</i>                                                                                                                                                                                                                                                                                                                                                                                                                                                                                                                                                                                                                                                                                                                                                                                                                                                                                                                                                                                                                                                                                                                                                                                                                                                                                                                                                                                                                                                                                                                                                        |
| Manuscript ID:                  | bmjopen-2013-004523                                                                                                                                                                                                                                                                                                                                                                                                                                                                                                                                                                                                                                                                                                                                                                                                                                                                                                                                                                                                                                                                                                                                                                                                                                                                                                                                                                                                                                                                                                                                                    |
| Article Type:                   | Protocol                                                                                                                                                                                                                                                                                                                                                                                                                                                                                                                                                                                                                                                                                                                                                                                                                                                                                                                                                                                                                                                                                                                                                                                                                                                                                                                                                                                                                                                                                                                                                               |
| Date Submitted by the Author:   | 21-Nov-2013                                                                                                                                                                                                                                                                                                                                                                                                                                                                                                                                                                                                                                                                                                                                                                                                                                                                                                                                                                                                                                                                                                                                                                                                                                                                                                                                                                                                                                                                                                                                                            |
| Complete List of Authors:       | Redfern, Julie; The George Institute for Global Health, Sydney Medical School, University of Sydney, Cardiovascular Division<br>Usherwood, Tim; University of Sydney,<br>Harris, Mark; University of New South Wales, School of Public Health and Community Medicine<br>Rodgers, Anthony; The George Institute for Global Health, Sydney Medical School, University of Sydney,<br>Hayman, Noel; Queensland Health, Inala Indigenous Health Service<br>Panaretto, Katie; Queensland Aboriginal and Islander Health Council, Population Health<br>Chow, Clara; The George Institute for Global Health, Sydney Medical School, University of Sydney, Westmead Hospital,<br>Lau, Annie; University of New South Wales,<br>Neubeck, Lis; The George Institute for Global Health, Cardiovascular Division; University of Sydney, School of Medicine<br>Coorey, Genevieve; The George Institute for Global Health,<br>Hersch, Fred; The George Institute for Global Health, Nuffield Department for Population Health, Oxford University,<br>Heeley, Emma; The George Institute for Global Health, Sydney, Sydney Medical School, University of Sydney,<br>Patel, Anushka; The George Institute for Global Health, Sydney Medical School, University of Sydney,<br>Jan, Stephen; The George Institute for Global Health, Sydney Medical School, University of Sydney,<br>Zwar, Nicholas; University of New South Wales, School of Public Health and Community Medicine<br>Peiris, David; The George Institute for Global Health, Sydney Medical School, University of Sydney, |
| <b>Primary Subject Heading</b>: | General practice / Family practice                                                                                                                                                                                                                                                                                                                                                                                                                                                                                                                                                                                                                                                                                                                                                                                                                                                                                                                                                                                                                                                                                                                                                                                                                                                                                                                                                                                                                                                                                                                                     |
| Secondary Subject Heading:      | Cardiovascular medicine, Health services research                                                                                                                                                                                                                                                                                                                                                                                                                                                                                                                                                                                                                                                                                                                                                                                                                                                                                                                                                                                                                                                                                                                                                                                                                                                                                                                                                                                                                                                                                                                      |
| Keywords:                       | Coronary heart disease < CARDIOLOGY, PREVENTIVE MEDICINE, PRIMARY CARE                                                                                                                                                                                                                                                                                                                                                                                                                                                                                                                                                                                                                                                                                                                                                                                                                                                                                                                                                                                                                                                                                                                                                                                                                                                                                                                                                                                                                                                                                                 |
|                                 |                                                                                                                                                                                                                                                                                                                                                                                                                                                                                                                                                                                                                                                                                                                                                                                                                                                                                                                                                                                                                                                                                                                                                                                                                                                                                                                                                                                                                                                                                                                                                                        |

1  
2  
3  
4  
5  
6  
7  
8  
9  
10  
11  
12  
13  
14  
15  
16  
17  
18  
19  
20  
21  
22  
23  
24  
25  
26  
27  
28  
29  
30  
31  
32  
33  
34  
35  
36  
37  
38  
39  
40  
41  
42  
43  
44  
45  
46  
47  
48  
49  
50  
51  
52  
53  
54  
55  
56  
57  
58  
59  
60

SCHOLARONE™  
Manuscripts

For peer review only

1  
2 **A randomised controlled trial of a consumer focussed e-health strategy for cardiovascular**  
3 **risk management in primary care: the consumer navigation of electronic cardiovascular**  
4 **tools (CONNECT) study protocol.**  
5  
6  
7  
8  
9

10  
11 Redfern J, Usherwood T, Harris MF, Rodgers A, Hayman N, Panaretto K, Chow C, Lau A,  
12  
13 Neubeck L, Coorey G, Hersch F, Heeley E, Patel A, Jan S, Zwar N, Peiris D  
14  
15

16  
17  
18 **Short Title:** Consumer Navigation of Electronic Cardiovascular Tools (CONNECT)  
19

20  
21 **Word Count:** 3765  
22

23 **Key words:** cardiovascular disease, risk factors, e-health, primary care  
24  
25  
26  
27

28 JR - The George Institute for Global Health, Sydney Medical School, University of Sydney,  
29  
30 Sydney, AUSTRALIA (jredfern@georgeinstitute.org.au)  
31

32 TU - Sydney Medical School (Westmead), University of Sydney, Sydney, AUSTRALIA  
33  
34 (tim.usherwood@sydney.edu.au)  
35

36 MH - University of New South Wales, Sydney, AUSTRALIA (m.f.harris@unsw.edu.au)  
37

38 AR - The George Institute for Global Health, Sydney Medical School, University of Sydney,  
39  
40 Sydney, AUSTRALIA (arodgers@georgeinstitute.org.au)  
41  
42

43 NH - Inala Indigenous Health Service, School of Medicine, University of Queensland  
44  
45 (noel\_hayman@health.qld.gov.au)  
46  
47

48 KP - University of Queensland (KatiePanaretto@qaihc.com.au)  
49

50 CC - The George Institute for Global Health, Sydney Medical School, University of Sydney,  
51  
52 Westmead Hospital, Sydney, AUSTRALIA (cchow@georgeinstitute.org.au).  
53  
54

55 AL - Centre for Health Informatics, Australian Institute of Health Innovation, University of New  
56  
57 South Wales, Sydney, AUSTRALIA (a.lau@unsw.edu.au)  
58  
59  
60

1  
2 LN –The George Institute for Global Health, Sydney Nursing School,University of Sydney,  
3  
4 Sydney, AUSTRALIA (lneubeck@georgeinstitute.org.au)  
5

6  
7 GC –The George Institute for Global Health, Sydney, AUSTRALIA  
8  
9 (gcoorey@georgeinstitute.org.au)  
10

11  
12 FH – The George Institute for Global Health, Nuffield Department for Population Health, Oxford  
13  
14 University, UK (fhersch@georgeinstitute.org.au)  
15

16  
17 EH - The George Institute for Global Health, Sydney, Sydney Medical School, University of  
18  
19 Sydney, AUSTRALIA (ehkeley@georgeinstitute.org.au)  
20

21  
22 AP - The George Institute for Global Health, University of Sydney, Sydney, AUSTRALIA  
23  
24 (apatel@georgeinstitute.org.au)  
25

26  
27 SJ - The George Institute for Global Health, University of Sydney, Sydney, AUSTRALIA  
28  
29 (sjan@georgeinstitute.org.au)  
30

31  
32 NZ – Faculty of Medicine, University of New South Wales, Sydney, AUSTRALIA  
33  
34 (n.zwar@unsw.edu.au)  
35

36  
37 DP - The George Institute for Global Health, University of Sydney  
38  
39 (dpieris@georgeinstitute.org.au)  
40

41  
42 **Corresponding author**  
43

44  
45 Julie Redfern  
46

47  
48 Level 10, King George V Building  
49

50  
51 Missenden Rd, Camperdown NSW  
52

53  
54 AUSTRALIA  
55

56  
57 jredfern@georgeinstitute.org.au  
58  
59  
60

## ABSTRACT

**Introduction:** Fewer than half of all people at highest risk of a cardiovascular event are receiving and adhering to best practice recommendations to lower their risk. In this project we examine the role of an e-health assisted consumer-focused strategy as a means of overcoming these gaps between evidence and practice. Consumer Navigation of Electronic Cardiovascular Tools (CONNECT) aims to test whether a consumer focused e-health strategy provided to Aboriginal and Torres Strait Islander and non-Indigenous adults, recruited through primary care, at moderate to high risk of a cardiovascular disease event will improve risk factor control when compared with usual care.

**Methods and Analysis:** Randomised controlled trial of 2000 participants with an average of 18 months follow-up to evaluate the effectiveness of an integrated consumer-directed e-health portal on cardiovascular risk compared to usual care in patients with cardiovascular disease or who are at moderate to high cardiovascular disease risk. The trial will be augmented by formal economic and process evaluations to assess acceptability, equity and cost-effectiveness of the intervention. The intervention group will participate in a consumer-directed e-health strategy for cardiovascular risk management. The programme is electronically integrated with the primary care provider's software and will include interactive smart phone and Internet platforms. The primary outcome is a composite endpoint of the proportion of people meeting Australian guideline recommended blood pressure (BP) and cholesterol targets. Secondary outcomes include change in mean blood pressure and fasting cholesterol levels, proportion meeting BP and cholesterol targets separately, self-efficacy, health literacy, self-reported point prevalence abstinence in smoking, body mass index and waist circumference, self-reported physical activity and self-reported medication adherence.

**Ethics and dissemination:** Primary ethics approval was received from the University of Sydney Human Research Ethics Committee and the Aboriginal Health and Medical Research Council.

1  
2 Results will be disseminated via the usual scientific forums including peer-reviewed publications  
3  
4 and presentations at international conferences. [Clinical Trials registration number,  
5  
6 ACTRN12613000715774].  
7  
8  
9

## 10 11 **STRENGTHS AND LIMITATIONS**

- 14 • This project we will examine the role of an integrated e-health consumer strategy as a means  
15 of overcoming such health system inefficiencies.  
16  
17
- 18 • The CONNECT study will generate rigorously evaluated findings on an issue of national  
19 and international importance.  
20  
21
- 22 • The development of a content rich, consumer focused e-health intervention that is fully  
23 integrated with the primary health care system will greatly inform the e-health agenda.  
24  
25
- 26 • If effective, the CONNECT e-health strategy could be up-scaled and expanded to increase  
27 compliance with international e-health strategies. The CONNECT strategy may also have  
28 applicability as a stand-alone strategy where electronic integration with primary care is  
29 unavailable.  
30  
31
- 32 • Potential limitations are that this is an Australian study and relies on integration with the  
33 Australian personally controlled e-health record. In addition, the intervention is primarily  
34 consumer driven.  
35  
36  
37  
38  
39  
40  
41  
42  
43  
44  
45  
46  
47  
48  
49  
50  
51  
52  
53  
54  
55  
56  
57  
58  
59  
60

## INTRODUCTION

### Cardiovascular disease burden

Cardiovascular disease (CVD), including coronary heart disease (CHD) and stroke, is the leading cause of death and disease burden globally.<sup>1</sup> Importantly in Australia, Aboriginal and Torres Strait Islander peoples experience approximately five times greater CVD burden than other Australians.<sup>2</sup> Fewer than 50% of adults who attend Australian general practice or Aboriginal Community Controlled Health Services (ACCHSs) are adequately screened for vascular risk and for those identified at high risk, only about 40% are receiving best practice care.<sup>3-5</sup> Similar findings have been noted in other Australian studies.<sup>6-9</sup> Adherence rates to lifestyle modification are around 30%<sup>10</sup> and adherence to recommended medicines may be as low as 50% after 6 months of therapy.<sup>11</sup> Overall, these studies have demonstrated failure to adequately implement effective interventions (that are also adhered to) to lower CVD risk for those that need it most.

### Consumer focused e-health interventions

During the past decade, there has been rapid development in consumer e-health. Several studies have shown the benefits of interactive internet portals for managing chronic conditions (asthma,<sup>12-14</sup> type 2 diabetes,<sup>15</sup> arthritis,<sup>16</sup> hypertension<sup>17</sup> and mental health.<sup>18,19</sup>), for health behaviour change,<sup>20,21</sup> and lifestyle risk factors (physical activity,<sup>22</sup> smoking cessation<sup>23</sup> and weight loss).<sup>24</sup> A Cochrane review of 124 studies concluded that computer-based 'Interactive Health Communication Applications' can also improve cognitive and social outcomes of patients with chronic conditions.<sup>25</sup> The emerging evidence on text message interventions also appears promising. Five randomised controlled trials (RCTs) have demonstrated the effectiveness of mobile phone text messaging to promote smoking cessation<sup>26,27</sup>, and a number of small RCTs have shown improved outcomes related to weight loss,<sup>28</sup> physical activity,<sup>29</sup> asthma medication adherence,<sup>30</sup> glycaemic control in diabetes,<sup>31</sup> blood pressure lowering,<sup>32</sup> liver transplantation,<sup>33</sup>

1  
2 and HIV treatment.<sup>34</sup> Other studies looking at text messaging systems to improve adherence to  
3  
4 lifestyle and medication recommendations for people with established coronary artery disease  
5  
6 are ongoing.<sup>35,36</sup>  
7  
8  
9

10  
11 Although the evidence for consumer-focused interventions is promising, there are few  
12  
13 randomised evaluations of personally controlled e-health records (PCEHR).<sup>37</sup> The PCEHR is the  
14  
15 Australian secure online summary of an individual's health information. This e-health record  
16  
17 allows people, their doctors, hospitals and other healthcare providers to view and share health  
18  
19 information and ideally improve care. Most studies investigating online personal health records  
20  
21 have had small sample sizes and short follow-up periods (< 12 months). This raises concerns  
22  
23 about their external validity and sustainability. One Australian system which features a personal  
24  
25 health record, tools to assist with making decisions, organising tasks, and a social networking  
26  
27 feature has been shown in a community based trial to promote improved uptake of influenza  
28  
29 vaccination amongst university students.<sup>38</sup> We are not aware of any RCTs that have incorporated  
30  
31 multiple e-health components as part of a multifaceted, complex intervention for chronic disease  
32  
33 management and prevention. Critically, there are no trials involving Aboriginal and Torres Strait  
34  
35 Islander peoples and attempts to integrate consumer strategies with Australian primary health  
36  
37 care electronic health records are at a very early stage.  
38  
39  
40  
41  
42  
43  
44  
45  
46

### 47 **Digital technologies and access**

48  
49 Equitable digital access is critical to implementation of the national e-health strategy. Digital  
50  
51 access is growing exponentially in Australia. In 2010-11, 79% of Australian households had  
52  
53 access to the Internet in their home and 77% of these used the Internet daily.<sup>39</sup> Amongst  
54  
55 Aboriginal and Torres Strait Islander adults, in 2008, 59% had internet access (up from 41% in  
56  
57 2002).<sup>40</sup> Mobile phone use has been dramatically rising and now outstrips computer access. In  
58  
59  
60



1  
2 2006-7, 81% of Australian consumers reported owning a mobile phone. Although growth was  
3  
4 originally driven by the younger market, the largest annual increase in mobile phone ownership  
5  
6 is among 65+ year olds.<sup>41</sup> Data on mobile phone access for Aboriginal and Torres Strait Islander  
7  
8 people are unclear, however in 2008, 67% of non-remote and 61% of remote households had  
9  
10 access to a pre-paid mobile phone and 41% and 19% respectively had mobile access via a  
11  
12 contract.<sup>41</sup> 'Smart phones', characterised by multimedia and Internet connectivity, are the biggest  
13  
14 growth area. In 2010-11, around 25% (3.9 million people) of Australians accessing the internet  
15  
16 did so via their phone (up 63% on the previous year).<sup>42</sup>  
17  
18  
19  
20  
21  
22

### 23 **HealthTracker e-health system**

24  
25 An electronic patient care system called HealthTracker has been previously developed and tested by  
26  
27 our research team.<sup>43</sup> This e-health system is essentially a clinical decision support system for CVD  
28  
29 risk management in primary care. HealthTracker is fully integrated with the primary health care  
30  
31 electronic health record and provides: (1) point of care decision support related to CVD  
32  
33 prevention and management; (2) a graphical patient counseling tool; (3) a computerised audit  
34  
35 tool that provides rapid snapshots on health service performance combined with a recall and  
36  
37 reminder system; and (4) access to a quality improvement web-based portal where health  
38  
39 services can view monthly peer-ranked performance and access tools and resources to support  
40  
41 quality care. HealthTracker has undergone significant proof of concept testing and validation,<sup>43-</sup>  
42  
43  
44  
45  
46  
47  
48  
49  
50  
51  
52  
53  
54  
55  
56  
57  
58  
59  
60  
and is currently being implemented in a large-scale cluster randomised controlled trial  
(TORPEDO) in Australia.<sup>42</sup> The trial is funded by the Australian National Health and Medical  
Research Council and involves 20 Aboriginal Community Controlled Health Services  
(ACCHSs), 40 General Practices and over 50,000 patients (Grant ID #1010547,  
ACTRN12611000478910). However, HealthTracker is a provider-directed strategy and the  
added value of a consumer or patient-focused interface remains unknown. Therefore, the

1  
2 Consumer Navigation of Electronic Cardiovascular Tools (CONNECT) study aims to enhance  
3  
4 the existing HealthTracker system and utilise the growing e-health environment to scientifically  
5  
6 test whether a consumer focused e-health strategy provided to Aboriginal and Torres Strait  
7  
8 Islander as well as non-Indigenous people at moderate to high risk of a CVD event will improve  
9  
10 risk factor control when compared with usual health care. The study also aims to determine the  
11  
12 acceptability, equity and cost-effectiveness of such a strategy. We hypothesise that access to an  
13  
14 integrated and patient-centred e-health strategy will improve risk factor control when compared  
15  
16 with usual health care.  
17  
18  
19  
20  
21  
22

## 23 **METHODS AND ANALYSIS**

### 24 **Study design**

25  
26  
27  
28 CONNECT is a single blind, randomised, controlled trial involving 2000 regular adult health  
29  
30 service attendees at General Practices and Aboriginal Community Controlled Health Services  
31  
32 (ACCHSs) with an average follow-up of 18 months (Figure 1). The trial registration number is  
33  
34 ACTRN12613000715774. Prior to commencement, formal ethical approval will be obtained from  
35  
36 the University of Sydney Human Research Ethics Committee. Written and informed consent will  
37  
38 be obtained from all participants.  
39  
40  
41  
42  
43  
44

45 The study will be conducted across approximately 65 Australian General Practices and ACCHSs.  
46  
47 Participants with a diagnosis of CVD or who are at high risk of CVD will be randomly allocated  
48  
49 to either the control or intervention group. The control group will continue to participate in usual  
50  
51 health care, supported by HealthTracker, the intervention group will participate in the  
52  
53 CONNECT programme which is a consumer-directed e-health strategy for cardiovascular risk  
54  
55 management. The programme is electronically integrated with the primary care provider's  
56  
57 software and will include access to interactive smart phone and Internet platforms. Control arm  
58  
59  
60

1  
2 participants will not have access to the portal. However, at the end of study all participants  
3  
4 (control and intervention) will be offered portal access for a maximum of 12 months. Participants  
5  
6 will be assessed by personnel blinded to treatment allocation at face-to-face appointments at baseline  
7  
8 and 12 and at end of study.  
9  
10

### 11 12 13 **Randomisation**

14  
15 Eligible consenting participants will be randomly assigned to the e-health strategy or provision  
16  
17 of usual care for an average of 18 months (minimum 12 months, maximum 24 months). In both  
18  
19 groups, any advice and/or other interventions provided by the GP/health service will continue at  
20  
21 their health provider's discretion. Randomisation will be conducted independently using a central  
22  
23 computer-based randomisation service with equal allocation to intervention versus control. A  
24  
25 permuted block sequence will be used and will be stratified by level of CVD risk, study centre  
26  
27 and Aboriginal and/or Torres Strait Islander status. Study personnel taking follow-up assessments  
28  
29 will also be blinded to parallel group assignments.  
30  
31  
32  
33  
34  
35  
36  
37

### 38 **Participant eligibility**

39  
40 Consenting adult patients (>18 years) with access to the Internet at least once a month via mobile  
41  
42 phone, tablet or computer who are at moderate to high risk of a CVD event will be included.  
43  
44

45 Potential participants will be excluded if they have a severe intellectual disability or if they have  
46  
47 insufficient English to provide written, informed consent. Moderate-high CVD risk is defined as  
48  
49 any of the following:  
50

- 51 1. five year CVD risk  $\geq 10\%$  using the Framingham risk equation;
- 52 2. a clinically high risk condition (Aboriginal/Torres Strait Islander and age >75 years,  
53  
54 diabetes and age >60 years, diabetes and albuminuria, eGFR < 45ml/min, systolic BP  $\geq$   
55  
56 180mmHg, diastolic BP  $\geq 110$ mmHg, total cholesterol > 7.5mmol);<sup>46</sup>  
57  
58  
59  
60

- 1  
2  
3  
4  
5  
6  
7  
8  
9
3. an established CVD diagnosis (ischaemic heart disease, stroke/transient ischaemic attack, peripheral vascular disease).

## 10 **Recruitment**

11 We will aim to recruit approximately 30 participants from each of a total of 65 General Practices  
12 and ACCHSs. Eligible patients will be identified by clinic staff using a customised electronic  
13 data extraction facility in the practice software system<sup>47</sup> which was successfully used in the  
14 TORPEDO trial.<sup>43</sup> Potential participants will receive an invitation letter from their General  
15 Practitioner (GP). Eligibility will then be confirmed during a telephone phone call from a study  
16 research assistant. Interested individuals will be invited to a face-to-face registration visit at  
17 the practice from which they were identified. At the initial visit, written informed consent will be  
18 obtained and the baseline assessment completed by a CONNECT research assistant. Practices  
19 will be reimbursed a small fee (in line with a standard consultation fee) for the time required to  
20 assist with recruitment if the minimum of 25 patients per practice are recruited. All software  
21 license costs and technical support associated with the *HealthTracker* system will be provided  
22 free for the duration of the trial.  
23  
24  
25  
26  
27  
28  
29  
30  
31  
32  
33  
34  
35  
36  
37  
38  
39  
40  
41

## 42 **Intervention**

43 The intervention group will participate in the CONNECT programme which is a consumer  
44 focused e-health strategy aimed at assisting with the management and prevention of CVD  
45 (Figure 2). The programme components focus on cardiovascular risk assessment, medication  
46 adherence, lifestyle change and seamless patient-provider communication. CONNECT content  
47 has been informed by a detailed analysis of factors that drive uptake of Internet-based  
48 programmes for CVD secondary prevention.<sup>48</sup> HealthTracker assessment data (e.g. CVD risk  
49 factors and scores, medications and other treatment advice) are uploaded securely to a consumer-  
50  
51  
52  
53  
54  
55  
56  
57  
58  
59  
60

1  
2 focused CVD specific module built using a e-health record architecture. Patients will then be  
3  
4 able to securely register for access to the integrated portal. Throughout the trial, a minimum of  
5  
6 one upload from their software to the CONNECT portal will be performed by the GP or an  
7  
8 authorised staff member for participants randomised to the intervention. Subsequent uploads to  
9  
10 the CONNECT system will be at the discretion of the treating practitioner and will depend on  
11  
12 visit frequency and availability of new data (based on changes in patient care and frequency of  
13  
14 visits). An alert will be flagged in the application if a new upload has occurred. CONNECT was  
15  
16 systematically developed through an iterative process and using user-centred design approach.<sup>49</sup>  
17  
18  
19 The intervention development process involved collaborative design workshops (including  
20  
21 journey mapping and persona building),<sup>49</sup> sketching and iterative validation by consumers.  
22  
23  
24  
25  
26  
27

28 The portal will be accessible via the Internet and also via a downloadable application for use on a  
29  
30 mobile device. As described in Figure 2, participants in the intervention arm will be able to  
31  
32 securely access the consumer portal via a secure login process. Patient data will be electronically  
33  
34 uploaded from the clinic record to the portal. As part of the intervention, an implementation team  
35  
36 of ‘CONNECT coordinators’ will provide face-to-face training to participants on how to use the  
37  
38 various features in the portal. Key training features include: (i) viewing personal health record  
39  
40 summary including information such as medicines, test results, blood pressure, weight; (ii) use of  
41  
42 interactive tools and resources (eg. the *HealthTracker* risk calculator that visually plots CVD risk  
43  
44 projections and allows people to perform ‘what if scenarios’ to explore the relative risk  
45  
46 reductions from various CVD risk factors), (iii) access to simple medication and healthy lifestyle  
47  
48 reminders and motivational message prompts depending on their choice and health profile (e.g.  
49  
50 smokers wanting to quit will be able to receive a series of random messages to assist with  
51  
52 cessation) and; (iv) an interactive goal setting and social media feature where people will be able  
53  
54 to set their own goals and receive virtual rewards and also communicate with other users using  
55  
56  
57  
58  
59  
60

1  
2 CONNECT. As part of the intervention, participants will be contacted at months one and two by  
3  
4 telephone and additional support will be provided as needed. At any time assistance will also be  
5  
6 available via a helpdesk number or via an on-line or mobile text help request. A CONNECT  
7  
8 coordinator will receive these requests and provide appropriate medical support or arrange  
9  
10 technical advice if needed. The CONNECT coordinators will be separate from the recruitment  
11  
12 and assessment team so as to maintain blinding of outcome assessments.  
13  
14  
15  
16  
17  
18

### 19 **Control group**

20  
21 Participants in both the intervention and control groups will continue with usual health care.  
22  
23 Control arm participants will not have access to the portal however, at the end of study all  
24  
25 participants (control and intervention) will be offered portal access for a maximum of 12 months.  
26  
27  
28  
29

### 30 **Data collection and study outcomes**

31  
32 Centrally employed CONNECT research assistants (blinded to group allocation) will conduct  
33  
34 study visits at baseline, 12 months and 24 months and ensure all clinical measures are entered  
35  
36 into a purpose-built and secure online database. Clinical and survey data will be collected via  
37  
38 face-to-face or phone interviews (if necessary) and entered into a secure central web-based  
39  
40 database. During 12 and 24 month assessments we will assess access to CVD management  
41  
42 services for both groups such as the frequency of GP and specialist visits (self-report), access to  
43  
44 allied health services (eg, dietitian and psychologists) and community groups or activities (eg,  
45  
46 local walking group, online smoking cessation program). In addition, analytic information from  
47  
48 the CONNECT portal and smartphone application will be extracted on a monthly basis to  
49  
50 determine usage patterns (website and smartphone/tablet application). This study will be  
51  
52 monitored and managed centrally with periodic site monitoring visits.  
53  
54  
55  
56  
57  
58  
59  
60

1  
2 The primary endpoint is the proportion of participants at end of study whose blood pressure  
3  
4 AND fasting low density lipoprotein (LDL) cholesterol are meeting Australian guideline targets  
5  
6 (defined as:  $\leq 130/80$  for participants with CVD, diabetes or albuminuria OR  $\leq 140/90$ mmHg for  
7  
8 all others participants) AND LDL-cholesterol  $< 2.0$ mmol/L).<sup>50</sup> Secondary outcomes include the  
9  
10 mean difference from baseline in systolic and diastolic BP and fasting LDL cholesterol levels,  
11  
12 proportion meeting BP and LDL targets separately, self-efficacy, health literacy, self-reported  
13  
14 point prevalence abstinence in smoking, mean difference from baseline in body mass index and  
15  
16 waist circumference, self-reported physical activity and self-reported medication adherence  
17  
18  
19  
20  
21 (Table 1).  
22  
23  
24  
25

### 26 **Statistical Considerations**

27  
28 For the primary outcome measure, assumptions used in the sample size and power estimates  
29  
30 have been determined from TORPEDO data of 10,181 routinely attending patients at moderate to  
31  
32 high CVD risk. Calculations assume that 25% of people are meeting guideline recommended BP  
33  
34 and LDL targets (as defined above) at baseline with mean systolic BP 136mmHg (SD 17.2) and  
35  
36 mean LDL cholesterol 2.5mmol (SD 0.70). A total sample size of 2000 participants, allowing for  
37  
38 a 20% loss to follow-up would have 90% power to detect an absolute improvement of at least  
39  
40 7.5% in the proportion of people meeting recommended targets using two-sided tests, with p  
41  
42 values of less than 0.05 judged as significant. For secondary outcomes this translates to a  
43  
44 2.8mmHg absolute difference in systolic BP and a 0.11mmol/L absolute difference in LDL  
45  
46 cholesterol.  
47  
48  
49  
50  
51

52  
53  
54 Although there is little literature on effect sizes of e-health interventions for CVD risk factors,  
55  
56 we have powered the study on effect estimates that could be considered clinically meaningful for  
57  
58 a moderate-high risk population. Based on previous work on modelling cardiovascular risk factor  
59  
60

1  
2 reductions, the BP and LDL cholesterol effect sizes above could each translate to around a 5-  
3  
4 10% relative risk reduction (RRR) or a combined RRR of 10-19% in cardiovascular events.<sup>56</sup>  
5  
6  
7

8  
9 Primary analyses will be unadjusted, following an intention-to-treat principle and conducted  
10 blind to treatment allocation. If necessary, multivariate analyses will be performed to adjust for  
11 any significant differences between each study arm. Pre-specified analyses will be conducted on  
12 the following sub-groups: established CVD versus high risk non-CVD; Aboriginal versus non-  
13 Aboriginal; proportion meeting/not meeting the primary endpoint at baseline; proportion  
14 adherent/not adherent to guideline-recommended BP and lipid medicines at baseline.  
15  
16

17  
18 Characteristics will be compared between groups using independent t tests for continuous or  $X^2$   
19 tests for categorical variables. Mean risk factor levels will be compared between groups in terms  
20 of relative risks, 95% confidence intervals and two-sided p values. Mann-Whitney U tests will be  
21 used where data are not normally distributed.  
22  
23  
24  
25  
26  
27  
28  
29  
30  
31  
32  
33  
34

### 35 **Process evaluation**

36  
37 Process evaluations explore the implementation, receipt, and setting of an intervention and help  
38 in the interpretation of outcome results.<sup>57</sup> Our team has extensive experience in such  
39 evaluations.<sup>44,48,58</sup> Analyses will be informed by the Pawson and Tilley realistic evaluation  
40 model,<sup>59</sup> which seeks to understand human actors' choices and actions, within the context of the  
41 systems in which these players operate. We will use mixed methods to investigate why the e-  
42 health strategy may or may not have been effective and which intervention components were  
43 most influential. Four data sources will be used: (1) quantitative data on patient measures  
44 described above; (2) usage data extracted directly from the consumer portal; (3) patient and  
45 provider surveys of satisfaction, tool utility and health actions taken; (4) semi-structured  
46 interviews with participants and care providers (including GPs) toward the end of study.  
47  
48  
49  
50  
51  
52  
53  
54  
55  
56  
57  
58  
59  
60



1  
2  
3  
4  
5  
6  
7  
8  
9  
10  
11  
12  
13  
14  
15  
16  
17  
18  
19  
20  
21  
22  
23  
24  
25  
26  
27  
28  
29  
30  
31  
32  
33  
34  
35  
36  
37  
38  
39  
40  
41  
42  
43  
44  
45  
46  
47  
48  
49  
50  
51  
52  
53  
54  
55  
56  
57  
58  
59  
60

Multivariate sub-group analyses will assess for any differential impact of the intervention on outcome measures by Aboriginal status, postcode, income, education level, language spoken at home, age, gender and internet and mobile phone access. Qualitative data will explore participant views on benefits, disadvantages and acceptability of the portal. Taking an equity perspective, interviews will seek to understand barriers and enablers to uptake by particular sub-populations, including factors such as Internet/smartphone connectivity and geographical remoteness. To obtain a broad range of views we will use a maximum variation sampling method based on patient demographics and health service characteristics.<sup>60</sup> Sampling will continue until no new themes or categories emerge ('thematic saturation'). We anticipate around 80 interviews will be required based on previous experience. In ACCHSs, Aboriginal participants will be interviewed by Aboriginal researchers. As with previous research collaborations, support and training will be provided for Aboriginal health researchers in the process evaluation, focusing not only on data collection but also analysis and reporting. Analyses will be thematic and coding will be carried out inductively based on emergent themes. NVivo 9 will be used to assist with interview data management. Given the focus of CONNECT on consumer engagement with an e-health strategy, assessment of health literacy (including communication with providers and understanding of information provided) will allow greater understanding and explanation of potential clinical outcomes as well as barriers and enablers to engagement with the intervention. The process evaluation will provide important narratives on the role of e-health tools in the patient and care provider experience. These standalone research findings will make a novel contribution to translating findings into policy and practice.

## **Economic evaluation**

1  
2 A cost-effectiveness analysis will be undertaken to compare the e-health strategy with usual care.  
3  
4 The economic evaluation will entail two components: a trial-based economic evaluation and a  
5  
6 modeled economic evaluation of long term costs and outcomes. The trial based economic  
7  
8 evaluation will estimate the incremental cost-effectiveness of the e-health strategy in in terms of  
9  
10 quality adjusted life years (QALY) as measured over the follow-up period. This will enable an  
11  
12 incremental cost per QALY gained to be estimated. The direct costs of the intervention over and  
13  
14 above usual care, including training support and software maintenance, will be assessed.  
15  
16  
17 Alongside these will be cost offsets, in which the difference between the costs incurred in the  
18  
19 utilization of health services, medications and tests between treatment groups will be assessed.  
20  
21  
22 Data for these costs will be drawn from automated extracts of health service records (e.g. service  
23  
24 utilisation) and from self-reported questionnaires (eg, events, hospitalisations and quality of life).  
25  
26  
27 Details on medications, laboratory tests, and service utilisation will be costed at prevailing rates.  
28  
29  
30 Hospitalisations will be costed using standard Australian National Diagnosis Related Groups  
31  
32 (AN-DRG) cost weights.  
33  
34  
35  
36  
37 A modeled economic evaluation will be built onto the trial to enable quality of life and survival  
38  
39 to be examined over a longer time frame than the trial follow-up period. Patients in usual care  
40  
41 and the e-health strategy would be tracked over this extended period to capture various health  
42  
43 states (including death and various cardiovascular events). Transition across these health states  
44  
45 will be based on probabilities in relation to long term treatment effects, safety and disease  
46  
47 progression derived from the trial findings and/or literature review. Data on costs and quality of  
48  
49 life attached to various health states will also be drawn from literature review and trial data. With  
50  
51 appropriate discounting, estimates of long-term costs and outcomes will fold out of the model.  
52  
53  
54 Sensitivity analyses will be conducted on variables such as discount rate, uncertainty in outcome  
55  
56 estimates and assumptions made in costings. Different pricing scenarios will also be tested to  
57  
58  
59  
60

1  
2 determine threshold values for achieving cost-effectiveness, including cost-effectiveness of  
3  
4 different components of the strategy.  
5  
6  
7

## 9 **ETHICS AND DISSEMINATION**

10  
11 The findings of this study will be disseminated via the usual scientific forums including peer-  
12  
13 reviewed publications and presentations at international conferences. The study will be  
14  
15 administered by The George Institute for Global Health, with the design and conduct overseen  
16  
17 by a Steering Committee. This committee has expertise in large-scale clinical trials and  
18  
19 qualitative research, economic analysis, clinical cardiovascular disease management and healthy  
20  
21 policy implementation. This study will adhere to the National Health and Medical Research  
22  
23 Council ethical guidelines for human research. Formal ethical approval for this study has been  
24  
25 obtained from the University of Sydney Human Research Ethics Committee and the Aboriginal  
26  
27 Health and Medical Research Council. Written and informed consent will be obtained from all  
28  
29 participants.  
30  
31  
32  
33  
34  
35  
36

## 37 **CONCLUSION**

38  
39 Less than half of all people at highest risk of a CVD event are receiving and adhering to best  
40  
41 practice recommendations to lower their risk. In this project we will examine the role of e-health  
42  
43 assisted consumer strategies as a means of overcoming such health system inefficiencies. With  
44  
45 the availability of the Personally Controlled E-Health Record (PCEHR) for all Australians in  
46  
47 2012, consumer focused e-health is set to become a key component of the health system. Despite  
48  
49 the scale of this initiative, uptake has been slow and there is little research on the factors that will  
50  
51 support its uptake. Innovative strategies that are practical to implement and support negotiation  
52  
53 of care between consumers and care providers are therefore urgently needed.  
54  
55  
56  
57  
58  
59  
60

1  
2 The CONNECT study will generate rigorously evaluated findings on an issue of national and  
3  
4 international importance. The development of a content rich, consumer focused e-health  
5  
6 intervention that is fully integrated with the primary health care system will greatly inform the e-  
7  
8 health agenda. Equitable access to these emerging technologies is essential and this study, both  
9  
10 quantitatively and qualitatively, tests the acceptability and effectiveness of the intervention for  
11  
12 Aboriginal and Torres Strait Islander peoples and other socio-economically disadvantaged  
13  
14 groups. The intervention will be compliant with Australian PCEHR specifications, thus allowing  
15  
16 for seamless inter-operability. This maximises its viability for large scale implementation across  
17  
18 Australia. If found to be successful, the CONNECT e-health strategy could be up-scaled and  
19  
20 expanded to increase compliance with international e-health strategies. The CONNECT strategy  
21  
22 may also have applicability as a stand-alone strategy where electronic integration with primary  
23  
24 care is unavailable.  
25  
26  
27  
28  
29  
30  
31  
32

### 33 **COMPETING INTERESTS**

34  
35 None to declare.  
36  
37  
38  
39

### 40 **AUTHORS CONTRIBUTIONS**

41  
42 JR and DP conceived the study and intervention, and drafted the protocol. TU, MH, AR, NH,  
43  
44 KP, CC, EH, AP, NZ and EC contributed the scientific design and protocol development. SJ led  
45  
46 the economic analysis aspect of the design. AL, LN, GC, FH, contributed to the practical  
47  
48 components of the intervention design and delivery. All authors read and approved the final  
49  
50 manuscript.  
51  
52  
53  
54  
55  
56  
57  
58  
59  
60

**FUNDING STATEMENT**

This work was supported by the National Health and Medical Research Council (Australia) for (APP1047508). JR is funded by a NHMRC/National Heart Foundation Postdoctoral Fellowship. LN and DP are supported by a NHMRC Postdoctoral Training Fellowships. AP and MH are supported by an NHMRC Senior Research Fellowship.

For peer review only

1  
2  
3  
4  
5  
6  
7  
8  
9  
10  
11  
12  
13  
14  
15  
16  
17  
18  
19  
20  
21  
22  
23  
24  
25  
26  
27  
28  
29  
30  
31  
32  
33  
34  
35  
36  
37  
38  
39  
40  
41  
42  
43  
44  
45  
46  
47  
48  
49  
50  
51  
52  
53  
54  
55  
56  
57  
58  
59  
60  
**REFERENCES**

1. World Health Organisation: The top 10 causes of death. 2004 October 2008; Fact sheet N°310:[Available from: <http://www.who.int/mediacentre/factsheets/fs310/en/index.html>].
2. Vos T, Barker B, Stanley L, et al. *The burden of disease and injury in Aboriginal and Torres Strait Islander peoples 2003*. Brisbane: University of Queensland, 2007.
3. Heeley E, Peiris D, Patel A, et al. Cardiovascular risk perception and the evidence practice gap in Australian General Practice (the AusHEART study). *Med j Aust* 2010;192(5):254-259.
4. Peiris D, Patel A, Cass A, et al. Cardiovascular disease risk management for Aboriginal and Torres Strait Islander peoples in primary health care settings - findings from the Kanyini Audit. *Med j Aust* 2009;191(6):304-309.
5. Webster R, Heeley E, Peiris D, et al. Identifying the gaps in cardiovascular risk management. *The Med j Aust* 2009;191(6):324-329.
6. Reid C, Nelson MR, Shiel L, et al. Australians at risk: management of cardiovascular risk factors in the REACH Registry. *HeartLung Circ* 2008;17(2):114-118.
7. Wan Q, Harris MF, Jayasinghe UW, et al. Quality of diabetes care and coronary heart disease absolute risk in patients with type 2 diabetes mellitus in Australian general practice. *Qual Saf Health Care* 2006;15(2):131-135.
8. Steven I, Wing L. Control and cardiovascular risk factors of hypertension. An assessment of a sample of patients *Aust. Fam. Physician* 1999;28(1):45-48.
9. Vale MJ, Jelinek MV, Best JD. How many patients with coronary heart disease are not achieving their risk-factor targets? Experience in Victoria 1996-1998 versus 1999-2000. *Med J Aust* 2002;176(5):211-215.
10. Chow CK, Jolly S, Rao-Melacini P, et al. Association of Diet, Exercise, and Smoking Modification With Risk of Early Cardiovascular Events After Acute Coronary Syndromes. *Circulation* 2010;121:750-758.

- 1  
2  
3  
4  
5  
6  
7  
8  
9  
10  
11  
12  
13  
14  
15  
16  
17  
18  
19  
20  
21  
22  
23  
24  
25  
26  
27  
28  
29  
30  
31  
32  
33  
34  
35  
36  
37  
38  
39  
40  
41  
42  
43  
44  
45  
46  
47  
48  
49  
50  
51  
52  
53  
54  
55  
56  
57  
58  
59  
60
11. Benner JS, Glynn RJ, Mogun H, et al. Long-term persistence in use of statin therapy in elderly patients. *JAMA* 2002;288(4):455-461.
12. Chan DS, Callahan CW, Hatch-Pigott VB, et al. Internet-based home monitoring and education of children with asthma is comparable to ideal office-based care: results of a 1-year asthma in-home monitoring trial. *Pediatrics* 2007;119(3):569-578.
13. Jan RL, Wang JY, Huang MC, et al. An internet-based interactive telemonitoring system for improving childhood asthma outcomes in Taiwan. *Telemed J E Health* 2007;13(3):257-268.
14. van der Meer V, van Stel HF, Detmar SB, et al. Internet-based self-management offers an opportunity to achieve better asthma control in adolescents. *Chest* 2007;132(1):112-119.
15. Grant RW, Wald JS, Schnipper JL, et al. Practice-Linked Online Personal Health Records for Type 2 Diabetes Mellitus: A Randomized Controlled Trial. *Arch Intern Med* 2008;168(16):1776-1782.
16. Stinson JN, Mcgrath PJ, Hodnett ED, et al. An Internet-based Self-management Program with Telephone Support for Adolescents with Arthritis: A Pilot Randomized Controlled Trial. *J Rheumatol* 2010;37(9):1944-1952.
17. Green BB, Cook AJ, Ralston JD, et al. Effectiveness of home blood pressure monitoring, Web communication, and pharmacist care on hypertension control: a randomized controlled trial. *JAMA* 2008;299(24):2857-2867.
18. Andrews G, Cuijpers P, Craske MG, et al. Computer therapy for the anxiety and depressive disorders is effective, acceptable and practical health care: a meta-analysis. *PLoS One* 2010;5(10):e13196.
19. Titov N, Andrews G, Schwencke G, et al. Randomized controlled trial of Internet cognitive behavioural treatment for social phobia with and without motivational enhancement strategies. *Aust N Z J Psychiatry* 2010;44(10):938-945.

- 1  
2  
3  
4  
5  
6  
7  
8  
9  
10  
11  
12  
13  
14  
15  
16  
17  
18  
19  
20  
21  
22  
23  
24  
25  
26  
27  
28  
29  
30  
31  
32  
33  
34  
35  
36  
37  
38  
39  
40  
41  
42  
43  
44  
45  
46  
47  
48  
49  
50  
51  
52  
53  
54  
55  
56  
57  
58  
59  
60
20. Webb LT, Joseph J, Yardley L, et al. Using the Internet to Promote Health Behavior Change: A Systematic Review and Meta-analysis of the Impact of Theoretical Basis, Use of Behavior Change Techniques, and Mode of Delivery on Efficacy. *J Med Internet Res* 2010;12(1):e4.
  21. Wantland DJ, Portillo CJ, Holzemer WL, et al. The effectiveness of Web-based vs. non-Web-based interventions: a meta-analysis of behavioral change outcomes. *J Med Internet Res* 2004;6(4):e40.
  22. van den Berg MH, Schoones JW, Vliet Vlieland TP. Internet-based physical activity interventions: a systematic review of the literature. *J Med Internet Res* 2007;9(3):e26.
  23. Balmford J, Borland R, Benda P. Patterns of Use of an Automated Interactive Personalized Coaching Program for Smoking Cessation. *J Med Internet Res* 2008;10(5):e54.
  24. Stevens JV, Funk LK, Brantley JP, et al. Design and Implementation of an Interactive Website to Support Long-Term Maintenance of Weight Loss. *J Med Internet Res* 2008;10(1):e1.
  25. Murray E, Burns J, See TS, et al. Interactive Health Communication Applications for people with chronic disease. *Cochrane Database Syst Rev* 2005(4):CD004274.
  26. Free C, Knight R, Robertson S, et al. Smoking cessation support delivered via mobile phone text messaging (txt2stop): a single-blind, randomised trial. *Lancet* 2011;378(9785):49-55.
  27. Whittaker R, Borland R, Bullen C, et al. Mobile phone-based interventions for smoking cessation. *Cochrane Database Syst Rev* 2009;4(CD006611).
  28. Patrick K, Raab F, Adams MA, et al. A text message-based intervention for weight loss: randomized controlled trial. *J Med Internet Res* 2009;11(1):e1.
  29. Hurling R, Catt M, Boni MD, et al. Using internet and mobile phone technology to deliver an automated physical activity program: randomized controlled trial. *J Med Internet Res* 2007;9(2):e7.



- 1  
2  
3  
4  
5  
6  
7  
8  
9  
10  
11  
12  
13  
14  
15  
16  
17  
18  
19  
20  
21  
22  
23  
24  
25  
26  
27  
28  
29  
30  
31  
32  
33  
34  
35  
36  
37  
38  
39  
40  
41  
42  
43  
44  
45  
46  
47  
48  
49  
50  
51  
52  
53  
54  
55  
56  
57  
58  
59  
60
30. Petrie KJ, Perry K, Broadbent E, et al. A text message programme designed to modify patients' illness and treatment beliefs improves self-reported adherence to asthma preventer medication. *Br J Health Psychol* 2012;17(1):74-84.
31. Franklin VL, Waller A, Pagliari C, et al. A randomized controlled trial of Sweet Talk, a text-messaging system to support young people with diabetes. *Diabet Med* 2006;23(12):1332-1338.
32. Marquez Contreras E, de la Figuera von Wichmann M, Gil Guillen V, et al. Effectiveness of an intervention to provide information to patients with hypertension as short text messages and reminders sent to their mobile phone (HTA-Alert). *Aten Primaria* 2004;34(8):399-405.
33. Miloh T, Annunziato R, Arnon R, et al. Improved adherence and outcomes for pediatric liver transplant recipients by using text messaging. *Pediatrics* 2009;124(5):e844-850.
34. Lester RT, Ritvo P, Mills EJ, et al. Effects of a mobile phone short message service on antiretroviral treatment adherence in Kenya (WelTel Kenya1): a randomised trial. *Lancet* 2010;376:376: 1838–1845.
35. Chow CK, Redfern J, Thiagalingam A, et al. Design and rationale of the tobacco, exercise and diet messages (TEXT ME) trial of a text message-based intervention for ongoing prevention of cardiovascular disease in people with coronary disease: a randomised controlled trial protocol. *BMJ Open* 2012;2(1).
36. Redfern J, Thiagalingam A, Jan S, et al. Development of a set of mobile phone text messages designed for prevention of recurrent cardiovascular events. *Eur J Prev Cardiol* 2012 doi: 10.1177/2047487312449416.
37. Tang PC, Ash JS, Bates DW, et al. Personal health records: definitions, benefits, and strategies for overcoming barriers to adoption. *J Am Med Inform Assoc.* 2006;13(2):121-126.

- 1  
2  
3  
4  
5  
6  
7  
8  
9  
10  
11  
12  
13  
14  
15  
16  
17  
18  
19  
20  
21  
22  
23  
24  
25  
26  
27  
28  
29  
30  
31  
32  
33  
34  
35  
36  
37  
38  
39  
40  
41  
42  
43  
44  
45  
46  
47  
48  
49  
50  
51  
52  
53  
54  
55  
56  
57  
58  
59  
60
38. Lau AYS, Sintchenko V, Crimmins J, et al. Protocol for a randomised controlled trial examining the impact of a web-based personal health management system on the uptake of influenza vaccination rates. *BMC Health Ser Res* 2012;*in press accepted 3/2/2012*.
39. IOM (Institute of Medicine). *Health IT and Patient Safety: Building Safer Systems for Better Care*. Washington, DC: The National Academies Press, 2012.
40. Australian Bureau of Statistics. *Household Use of Information Technology, Australia, 2010-11*. Catalogue number 8146.0. Canberra: Commonwealth of Australia, 2011.  
<http://www.abs.gov.au/ausstats/abs@.nsf/mf/8146.0>
41. Australian Bureau of Statistics. *National Aboriginal and Torres Strait Islander Social Survey, 2008*. Cat. no.4714.0. Canberra: Commonwealth of Australia, 2010.
42. Australian Media Communications Authority. *ACMA Communications report 2010-11*. Canberra: Commonwealth of Australia, 2011.
43. Peiris D Usherwood T, Panaretto K, et al. The Treatment Of cardiovascular Risk in Primary care using Electronic Decision supOrt (TORPEDO) study- protocol for a cluster randomised, controlled trial of an electronic decision support and quality improvement intervention in Australian primary health care. *BMJ Open* 2012;2:e002177.  
doi:10.1136/bmjopen-2012-002177
44. Peiris D, Joshi R, Webster R, et al. An Electronic Clinical Decision Support Tool to Assist Primary Care Providers in Cardiovascular Disease Risk Management: Development and Mixed Methods Evaluation. *J Med Internet Res* 2009;11(4):e51.
45. Peiris D, Usherwood T, Weeramanthri T, et al. New tools for an old trade: a socio-technical appraisal of how electronic decision support is used by primary care practitioners. *Sociol Health Illn* 2011;10.1111/j.467-9566.2011.01361.x [epub ahead of print].
46. National Vascular Disease Prevention Alliance. *Guidelines for the assessment of absolute cardiovascular risk*: National Vascular Disease Prevention Alliance, 2009.

- 1  
2  
3  
4  
5  
6  
7  
8  
9  
10  
11  
12  
13  
14  
15  
16  
17  
18  
19  
20  
21  
22  
23  
24  
25  
26  
27  
28  
29  
30  
31  
32  
33  
34  
35  
36  
37  
38  
39  
40  
41  
42  
43  
44  
45  
46  
47  
48  
49  
50  
51  
52  
53  
54  
55  
56  
57  
58  
59  
60
47. PEN Computer Systems. Clinical Audit Tool. <http://www.clinicalaudit.com.au/> Access 30<sup>th</sup> August 2013.
48. Neubeck L, Ascanio R, Bauman A, et al. Planning Locally Relevant Internet Programs for Secondary Prevention of Cardiovascular Disease. *Eur J Cardiovascul Nurs* 2011;10(4):213-220.
49. Fogg BJ. *Persuasive Technology: Using computers to change what we think and do*. Morgan Kaufmann Publishers: United States of America; 2003.
50. National Heart Foundation of Australia and the Cardiac Society of Australia and New Zealand. Reducing risk in heart disease: an expert guide to clinical practice for secondary prevention of coronary heart disease. Melbourne: [Available at <http://www.heartfoundation.org.au/SiteCollectionDocuments/Reducing-risk-in-heart-disease.pdf>]National Heart Foundation of Australia, 2012
51. Osborne RH, Batterham RW, Elsworth GR, et al. The grounded psychometric development and initial validation of the Health Literacy Questionnaire (HLQ) *BMC Public Health* 2013, 13:658.
52. Norman CD, Skinner HA. eHEALS: The eHealth Literacy Scale. *J Med Int Res* 2006;8(4):e27.
53. World Health Organisation. Global Physical Activity Questionnaire (GPAQ) Analysis Guide.2011 Available on line at: <http://www.who.int/chp/steps/GPAQ/en/index.html> Accessed: 14th June 2013.
54. West R, Hajek P, Stead L, et al. Outcome criteria in smoking cessation trials: proposal for a common standard. *Addiction* 2005;100(3):299-303.
55. Viney R. Time trade-off derived EQ-5D weights for Australia. *Value in health* 2011;14(6):928.

- 1  
2 56. Pill Collaborative Group. An International Randomised Placebo-Controlled Trial of a Four-  
3  
4 Component Combination Pill (“Polypill”) in People with Raised Cardiovascular Risk.  
5  
6 *PLoS One* 2011;6(5):e19857.  
7  
8  
9 57. Oakley A, Strange V, Bonell C, et al. Process evaluation in randomised controlled trials of  
10  
11 complex interventions. *BrMed J* 2006;332(7538):413-416.  
12  
13  
14 58. Jan S, Usherwood T, Brien JA, et al. What determines adherence to treatment in  
15  
16 cardiovascular disease prevention? Protocol for a mixed methods preference study. *BMJ*  
17  
18 *Open* 2011;1(2).  
19  
20  
21 59. Pawson R, Tilley N. *Realistic evaluation*. London; Thousand Oaks: Sage, 1997.  
22  
23  
24 60. Patton M. *Qualitative research and evaluation methods*. 2002.  
25  
26  
27  
28  
29  
30  
31  
32  
33  
34  
35  
36  
37  
38  
39  
40  
41  
42  
43  
44  
45  
46  
47  
48  
49  
50  
51  
52  
53  
54  
55  
56  
57  
58  
59  
60

**TABLE 1: Primary and secondary outcomes (measured at baseline, 12 months and end of study)**

**Primary**

Proportion of participants meeting Australian guideline blood pressure (BP) AND lipid targets<sup>50</sup>

Targets are defined as:

≤130/80 for people with CVD, diabetes or albuminuria OR

≤140/90mmHg for all others; AND a LDL cholesterol <2.0mmol/L.

BP is based on an average of 3 resting, sitting digital recordings with the mean of last two readings and LDL-cholesterol is measured on a fasting blood sample.

**Secondary**

- Proportion meeting guideline recommended BP and LDL-cholesterol targets separately
- Difference in mean systolic and diastolic BP at end of study
- Difference in mean cholesterol levels at end of study (TC, LDL, HDL)
- Difference in mean body mass index and waist circumference at end of study
- Difference in health literacy scores - Health Literacy Questionnaire (HLQ)<sup>51</sup> and the e-health Literacy Scale (eHEALS)<sup>52</sup> at end of study
- Cardiovascular and renal events, new onset diabetes – self report and confirmed with medical records
- Physical activity – World Health Organisation Global Physical Activity Questionnaire<sup>53</sup>
- Point abstinence in smoking (≤ five cigarettes in the previous seven days<sup>54</sup> or recent smoking according to assessment using carbon monoxide meter)
- Fruit and vegetable intake, fish, salt and saturated fat intake – self report portions

1  
2  
3  
4  
5  
6  
7  
8  
9  
10  
11  
12  
13  
14  
15  
16  
17  
18  
19  
20  
21  
22  
23  
24  
25  
26  
27  
28  
29  
30  
31  
32  
33  
34  
35  
36  
37  
38  
39  
40  
41  
42  
43  
44  
45  
46  
47  
48  
49  
50  
51  
52  
53  
54  
55  
56  
57  
58  
59  
60

consumed in 7 days prior and compared with published guidelines recommendations

- Cardioprotective medication adherence – self report and verified by medical record and pharmaceutical benefits scheme data
- All cause mortality – medical record
- Hospital readmissions – self report and verified by medical record
- Health-related Quality of life – EQ5D (version 5L with Australian standardised weights<sup>55</sup>)

CVD = cardiovascular disease, LDL = low density lipoprotein cholesterol, BP = blood pressure, TC = total cholesterol, HDL = high density lipoprotein cholesterol

FIGURE 1 :CONNECT Study Schema

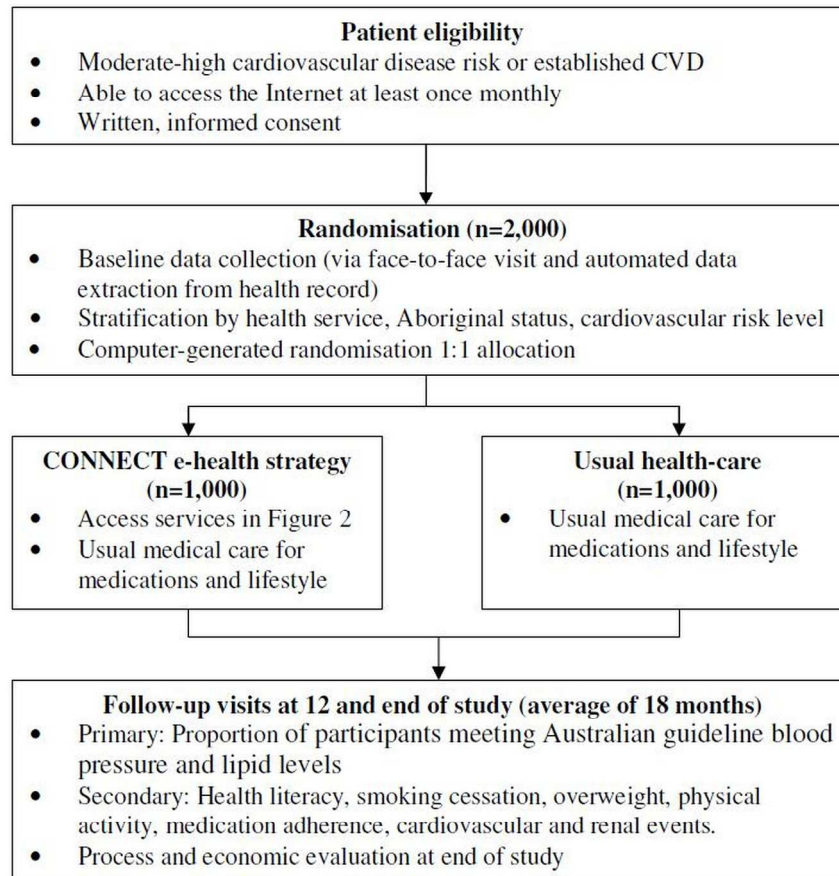FIGURE 1 :CONNECT Study Schema  
223x230mm (300 x 300 DPI)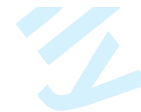

1  
2  
3  
4  
5  
6  
7  
8  
9  
10  
11  
12  
13  
14  
15  
16  
17  
18  
19  
20  
21  
22  
23  
24  
25  
26  
27  
28  
29  
30  
31  
32  
33  
34  
35  
36  
37  
38  
39  
40  
41  
42  
43  
44  
45  
46  
47  
48  
49  
50  
51  
52  
53  
54  
55  
56  
57  
58  
59  
60

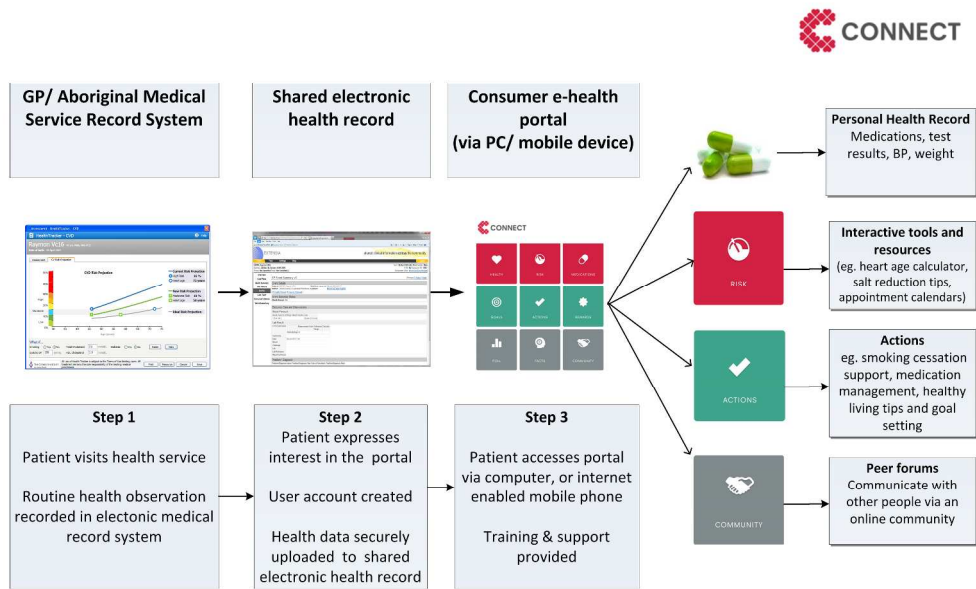

FIGURE 2: The consumer focused e-health strategy linked to primary health care 297x210mm (300 x 300 DPI)

view only



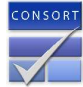

## CONSORT 2010 checklist of information to include when reporting a randomised trial\*

| Section/Topic                    | Item No | Checklist item                                                                                                                                                                              | Reported on page No |
|----------------------------------|---------|---------------------------------------------------------------------------------------------------------------------------------------------------------------------------------------------|---------------------|
| <b>Title and abstract</b>        |         |                                                                                                                                                                                             |                     |
|                                  | 1a      | Identification as a randomised trial in the title                                                                                                                                           | 1                   |
|                                  | 1b      | Structured summary of trial design, methods, results, and conclusions (for specific guidance see CONSORT for abstracts)                                                                     | 3                   |
| <b>Introduction</b>              |         |                                                                                                                                                                                             |                     |
| Background and objectives        | 2a      | Scientific background and explanation of rationale                                                                                                                                          | 4-7                 |
|                                  | 2b      | Specific objectives or hypotheses                                                                                                                                                           | 7                   |
| <b>Methods</b>                   |         |                                                                                                                                                                                             |                     |
| Trial design                     | 3a      | Description of trial design (such as parallel, factorial) including allocation ratio                                                                                                        | 7                   |
|                                  | 3b      | Important changes to methods after trial commencement (such as eligibility criteria), with reasons                                                                                          | 8-9                 |
| Participants                     | 4a      | Eligibility criteria for participants                                                                                                                                                       | 8-9                 |
|                                  | 4b      | Settings and locations where the data were collected                                                                                                                                        | 9                   |
| Interventions                    | 5       | The interventions for each group with sufficient details to allow replication, including how and when they were actually administered                                                       | 9-11, Fig 2         |
| Outcomes                         | 6a      | Completely defined pre-specified primary and secondary outcome measures, including how and when they were assessed                                                                          | 11-12, Table 1      |
|                                  | 6b      | Any changes to trial outcomes after the trial commenced, with reasons                                                                                                                       | n/a                 |
| Sample size                      | 7a      | How sample size was determined                                                                                                                                                              | 12                  |
|                                  | 7b      | When applicable, explanation of any interim analyses and stopping guidelines                                                                                                                | 13                  |
| <b>Randomisation:</b>            |         |                                                                                                                                                                                             |                     |
| Sequence generation              | 8a      | Method used to generate the random allocation sequence                                                                                                                                      | 8                   |
|                                  | 8b      | Type of randomisation; details of any restriction (such as blocking and block size)                                                                                                         | 8                   |
| Allocation concealment mechanism | 9       | Mechanism used to implement the random allocation sequence (such as sequentially numbered containers), describing any steps taken to conceal the sequence until interventions were assigned | 8                   |
| Implementation                   | 10      | Who generated the random allocation sequence, who enrolled participants, and who assigned participants to interventions                                                                     | 8-9                 |
| Blinding                         | 11a     | If done, who was blinded after assignment to interventions (for example, participants, care providers, those                                                                                | 8                   |

|                                                      |     |                                                                                                                                                   |                |
|------------------------------------------------------|-----|---------------------------------------------------------------------------------------------------------------------------------------------------|----------------|
|                                                      |     | assessing outcomes) and how                                                                                                                       |                |
|                                                      | 11b | If relevant, description of the similarity of interventions                                                                                       | n/a            |
| Statistical methods                                  | 12a | Statistical methods used to compare groups for primary and secondary outcomes                                                                     | 13             |
|                                                      | 12b | Methods for additional analyses, such as subgroup analyses and adjusted analyses                                                                  | 13             |
| <b>Results</b>                                       |     |                                                                                                                                                   |                |
| Participant flow (a diagram is strongly recommended) | 13a | For each group, the numbers of participants who were randomly assigned, received intended treatment, and were analysed for the primary outcome    | Fig 1          |
|                                                      | 13b | For each group, losses and exclusions after randomisation, together with reasons                                                                  | n/a - protocol |
| Recruitment                                          | 14a | Dates defining the periods of recruitment and follow-up                                                                                           | n/a - protocol |
|                                                      | 14b | Why the trial ended or was stopped                                                                                                                | n/a - protocol |
| Baseline data                                        | 15  | A table showing baseline demographic and clinical characteristics for each group                                                                  | n/a - protocol |
| Numbers analysed                                     | 16  | For each group, number of participants (denominator) included in each analysis and whether the analysis was by original assigned groups           | n/a - protocol |
| Outcomes and estimation                              | 17a | For each primary and secondary outcome, results for each group, and the estimated effect size and its precision (such as 95% confidence interval) | n/a - protocol |
|                                                      | 17b | For binary outcomes, presentation of both absolute and relative effect sizes is recommended                                                       | n/a - protocol |
| Ancillary analyses                                   | 18  | Results of any other analyses performed, including subgroup analyses and adjusted analyses, distinguishing pre-specified from exploratory         | n/a - protocol |
| Harms                                                | 19  | All important harms or unintended effects in each group (for specific guidance see CONSORT for harms)                                             | n/a - protocol |
| <b>Discussion</b>                                    |     |                                                                                                                                                   |                |
| Limitations                                          | 20  | Trial limitations, addressing sources of potential bias, imprecision, and, if relevant, multiplicity of analyses                                  | n/a - protocol |
| Generalisability                                     | 21  | Generalisability (external validity, applicability) of the trial findings                                                                         | 16             |
| Interpretation                                       | 22  | Interpretation consistent with results, balancing benefits and harms, and considering other relevant evidence                                     | n/a - protocol |
| <b>Other information</b>                             |     |                                                                                                                                                   |                |
| Registration                                         | 23  | Registration number and name of trial registry                                                                                                    | 3,7            |
| Protocol                                             | 24  | Where the full trial protocol can be accessed, if available                                                                                       | n/a - protocol |
| Funding                                              | 25  | Sources of funding and other support (such as supply of drugs), role of funders                                                                   | 17             |

\*We strongly recommend reading this statement in conjunction with the CONSORT 2010 Explanation and Elaboration for important clarifications on all the items. If relevant, we also recommend reading CONSORT extensions for cluster randomised trials, non-inferiority and equivalence trials, non-pharmacological treatments, herbal interventions, and pragmatic trials. Additional extensions are forthcoming: for those and for up to date references relevant to this checklist, see [www.consort-statement.org](http://www.consort-statement.org).
